# Supplementary material for: Rice Bran Arabinoxylan Compound as a Natural Product for Cancer Treatment – An Evidence-based Assessment of the Effects and Mechanisms
Source: Preprints.org preprint supplement (doi:10.20944/preprints202310.1057.v1), 2023-10-17
Supplement: Supplementary file 2 [file supplementary]

## Supplementary S2. Summary of All Included Studies

Table S2.1. The characteristics of all included articles in alphabetic order of the first author's name.

| #  | First Author (Year)           | Country     | Language | Type       | RBAC Type     | Source | Design  | Condition | Action/Effect                                                            |
|----|-------------------------------|-------------|----------|------------|---------------|--------|---------|-----------|--------------------------------------------------------------------------|
| 1  | An (2011)                     | South Korea | Korean   | Thesis     | RBEP/EFR      | Erom   | Animal  | Cancer    | Antineoplastic                                                           |
| 2  | Badr El-Din et al. (2008)     | Egypt       | English  | Full paper | Biobran MGN-3 | Daiwa  | Animal  | Cancer    | Antineoplastic; Cytokine modulation                                      |
| 3  | Badr El-Din et al. (2016a)    | Egypt       | English  | Full paper | Biobran MGN-3 | Daiwa  | Animal  | Cancer    | Immunorestorative; Proapoptotic; Chemoprevention                         |
| 4  | Badr El-Din et al. (2016b)    | Egypt       | English  | Full paper | Biobran MGN-3 | Daiwa  | Animal  | Cancer    | Chemotherapeutic adjuvant                                                |
| 5  | Badr El-Din et al. (2016c)    | Egypt       | English  | Full paper | Biobran MGN-3 | Daiwa  | Animal  | Cancer    | Chemoprevention                                                          |
| 6  | Badr El-Din et al. (2019)     | Egypt       | English  | Full paper | Biobran MGN-3 | Daiwa  | Animal  | Cancer    | Antineoplastic; Proapoptotic; Radioprotection; Radiotherapy enhancement. |
| 7  | Badr El-Din et al. (2020)     | Egypt       | English  | Full paper | Biobran MGN-3 | Daiwa  | Animal  | Cancer    | Proapoptotic; Chemoprevention                                            |
| 8  | Bae et al. (2004)             | South Korea | Korean   | Full paper | Biobran MGN-3 | Daiwa  | Animal  | Cancer    | Antineoplastic                                                           |
| 9  | Bang et al. (2010)            | Vietnam     | English  | Full paper | Biobran MGN-3 | Daiwa  | RCT     | Cancer    | Chemotherapeutic adjuvant                                                |
| 10 | Brush et al. (2010)           | USA         | English  | Abstract   | Biobran MGN-3 | Daiwa  | Cell    | Cancer    | Proapoptotic                                                             |
| 11 | Cholujova et al. (2013)       | Slovakia    | English  | Full paper | Biobran MGN-3 | Daiwa  | RCT     | Cancer    | Immunorestorative; Cytokine modulation                                   |
| 12 | Endo and Kanbayashi (2003)    | Canada      | English  | Short Comm | Biobran MGN-3 | Daiwa  | Animal  | Healthy   | Chemoprotection                                                          |
| 13 | Ghoneum and Brown (1999)      | USA         | English  | Chapter    | Biobran MGN-3 | Daiwa  | Bef-Aft | Cancer    | Immunorestorative                                                        |
| 14 | Ghoneum and Gollapudi (2003)  | USA         | English  | Full paper | Biobran MGN-3 | Daiwa  | Cell    | Cancer    | Proapoptotic                                                             |
| 15 | Ghoneum and Gollapudi (2005a) | USA         | English  | Full paper | Biobran MGN-3 | Daiwa  | Cell    | Cancer    | Synergistic anticancer                                                   |
| 16 | Ghoneum and Gollapudi (2005b) | USA         | English  | Full paper | Biobran MGN-3 | Daiwa  | Cell    | Cancer    | Synergistic anticancer                                                   |
| 17 | Ghoneum and Gollapudi (2011)  | USA         | English  | Full paper | Biobran MGN-3 | Daiwa  | Cell    | Cancer    | Synergistic anticancer                                                   |
| 18 | Ghoneum (1999)                | USA         | English  | Abstract   | Biobran MGN-3 | Daiwa  | Bef-Aft | Cancer    | Immunorestorative                                                        |
| 19 | Ghoneum et al. (2000)         | USA         | English  | Abstract   | Biobran MGN-3 | Daiwa  | Cell    | Cancer    | Proapoptotic                                                             |
| 20 | Ghoneum et al. (2014)         | USA         | English  | Full paper | Biobran MGN-3 | Daiwa  | Cell    | Cancer    | Proapoptotic; Chemotherapeutic adjuvant                                  |
| 21 | Ghoneum et al. (2013)         | USA         | English  | Full paper | Biobran MGN-3 | Daiwa  | Animal  | Healthy   | Radioprotection                                                          |
| 22 | Gollapudi and Ghoneum (2008)  | USA         | English  | Full paper | Biobran MGN-3 | Daiwa  | Cell    | Cancer    | Proapoptotic; Chemotherapeutic adjuvant                                  |

### *Rice Bran Arabinoxylan Compound as a Natural Product for Cancer Treatment*

|    |                              |             |          |            |                           |       |            |                 |                                               |
|----|------------------------------|-------------|----------|------------|---------------------------|-------|------------|-----------------|-----------------------------------------------|
| 23 | Golombick et al. (2016)      | Australia   | English  | Full paper | Biobran MGN-3             | Daiwa | Bef-Aft    | Cancer          | Immunorestorative                             |
| 24 | Hajtó et al. (2016)          | Hungary     | English  | Full paper | Biobran MGN-3             | Daiwa | Cross-Sect | Cancer          | Psychoneuroimmuno-modulation                  |
| 25 | Itoh et al. (2015)           | Japan       | English  | Full paper | Biobran MGN-3             | Daiwa | RCT        | Cancer          | Immunorestorative                             |
| 26 | Jacoby et al. (2001)         | USA         | English  | Full paper | Biobran MGN-3             | Daiwa | Animal     | Healthy         | Chemoprotection                               |
| 27 | Kim et al. (2011)            | South Korea | Korean   | Full paper | Fermented SuperC3GHi bran | Erom  | Animal     | Cancer          | Antineoplastic                                |
| 28 | Kim et al. (2007)            | South Korea | English  | Full paper | RBEP/EFR                  | Erom  | Animal     | Cancer          | Antineoplastic                                |
| 29 | Kim et al. (2020)            | South Korea | English  | Full paper | ONS                       | Erom  | NRCT       | Cancer          | Cytokine modulation                           |
| 30 | Lissoni et al. (2008)        | Italy       | English  | Full paper | Biobran MGN-3             | Daiwa | Bef-Aft    | Cancer          | Immunorestorative                             |
| 31 | Masood et al. (2013)         | Pakistan    | English  | Full paper | Biobran MGN-3             | Daiwa | RCT        | Cancer          | Chemoprotection; Psychoneuroimmuno-modulation |
| 32 | Noaman et al. (2008)         | Egypt       | English  | Full paper | Biobran MGN-3             | Daiwa | Animal     | Cancer          | Antineoplastic; Antioxidant                   |
| 33 | Pérez-Martínez et al. (2015) | Spain       | English  | Full paper | Biobran MGN-3             | Daiwa | Animal     | Cancer          | Antineoplastic                                |
| 34 | Pescatore et al. (2022)      | USA         | English  | Full paper | Biobran MGN-3             | Daiwa | Bef-Aft    | Cancer          | Antimetastatic                                |
| 35 | Petrovics et al. (2016)      | Hungary     | English  | Full paper | Biobran MGN-3             | Daiwa | RCT        | Cancer & CFS    | Psychoneuroimmuno-modulation                  |
| 36 | Takahara and Sano (2004)     | Japan       | Japanese | Full paper | Biobran MGN-3             | Daiwa | RCT        | Cancer          | Immunorestorative                             |
| 37 | Tan and Flores (2020)        | Philippines | English  | Full paper | Biobran MGN-3             | Daiwa | RCT        | Cancer          | Radioprotection; Psychoneuroimmuno-modulation |
| 38 | Zhao et al. (2020)           | China       | English  | Full paper | Biobran MGN-3             | Daiwa | Animal     | Gastroenteritis | Radioprotection                               |

**Abbreviations:** Bef-Aft, before and after study; CFS, chronic fatigue syndrome; Comm, communication; Cross-Sect, cross-sectional study; EFR, Erom's fermented rice bran; ONS, oral nutritional supplement; RBEP, rice bran bio-exopolymer; RCT, randomised controlled trial; USA, United States of America.

## References

- An, S. Y. (2011). *Immune-enhance and anti-tumor effect of exo-biopolymer extract from submerged culture of Lentinus edodes with rice bran* [Doctoral Thesis, Korea University]. Seoul, Republic of Korea.
- Badr El-Din, N. K., Abdel Fattah, S. M., Pan, D., Tolentino, L., & Ghoneum, M. (2016a). Chemopreventive activity of MGN-3/Biobran against chemical induction of glandular stomach carcinogenesis in rats and its apoptotic effect in gastric cancer cells. *Integrative Cancer Therapies*, 15(4), NP26-NP34. <https://doi.org/10.1177/1534735416642287>
- Badr El-Din, N. K., Ali, D. A., Alaa El-Dein, M., & Ghoneum, M. (2016b). Enhancing the apoptotic effect of a low dose of paclitaxel on tumor cells in mice by arabinoxylan rice bran (MGN-3/Biobran). *Nutrition and Cancer*, 68(6), 1010-1020. <https://doi.org/10.1080/01635581.2016.1192204>
- Badr El-Din, N. K., Ali, D. A., & Othman, R. M. (2016c). Inhibition of experimental carcinogenesis by the bioactive natural product Biobran. *Journal of Plant Protection and Pathology*, 7(1), 85-91. <https://doi.org/10.21608/jppp.2016.50064>
- Badr El-Din, N. K., Ali, D. A., Othman, R. M., French, S. W., & Ghoneum, M. (2020). Chemopreventive role of arabinoxylan rice bran, MGN-3/Biobran, on liver carcinogenesis in rats. *Biomedicine & Pharmacotherapy*, 126, 110064. <https://doi.org/10.1016/j.biopha.2020.110064>
- Badr El-Din, N. K., Areida, S. K., Ahmed, K. O., & Ghoneum, M. (2019). Arabinoxylan rice bran (MGN-3/Biobran) enhances radiotherapy in animals bearing Ehrlich ascites carcinoma. *Journal of Radiation Research*, 60(6), 747-758. <https://doi.org/10.1093/jrr/rrz055>
- Badr El-Din, N. K., Noaman, E., & Ghoneum, M. (2008). In vivo tumor inhibitory effects of nutritional rice bran supplement MGN-3/Biobran on Ehrlich carcinoma-bearing mice. *Nutrition and Cancer*, 60(2), 235-244. <https://doi.org/10.1080/01635580701627285>
- Bae, M. J., Lee, S. T., Chae, S. Y., Shin, S. H., Kwon, S. H., Park, M. H., Song, M. Y., & Hwang, S. J. (2004). The effects of the arabinoxylane and the polysaccharide peptide (PSP) on the antiallergy, anticancer. *Journal of the Korean Society of Food Science and Nutrition*, 33(3), 469-474. <https://doi.org/10.3746/jkfn.2004.33.3.469>
- Bang, M. H., Tran, V. R., Thinh, N. T., Song, L. H., Dung, T. T., Le, V. T., Le, V. D., Ky, T. D., Pan, D., Shaheen, M., & Ghoneum, M. (2010). Arabinoxylan rice bran (MGN-3) enhances the effects of interventional therapies for the treatment of hepatocellular carcinoma: a three-year randomized clinical trial. *Anticancer Research*, 30(12), 5145-5151.
- Brush, T. P., Trinh, S., Brawner, C. M., Ali, K. H., Hauke, R. J., & Elkahwaji, J. E. (2010). RBAC, a modified form of Arabinoxylan from rice bran, impairs prostate cancer cell line proliferation, adhesion, and invasion in vitro [Abstract]. *Cancer Research*, 70(8), 5662-5662. <https://doi.org/10.1158/1538-7445.AM10-5662>

- Cholujova, D., Jakubikova, J., Czako, B., Martisova, M., Hunakova, L., Duraj, J., Mistrik, M., & Sedlak, J. (2013). MGN-3 arabinoxylan rice bran modulates innate immunity in multiple myeloma patients. *Cancer Immunology, Immunotherapy*, 62(3), 437-445.  
<https://doi.org/10.1007/s00262-012-1344-z>
- Endo, Y., & Kanbayashi, H. (2003). Modified rice bran beneficial for weight loss of mice as a major and acute adverse effect of cisplatin. *Pharmacology and Toxicology*, 92(6), 300-303.  
<https://doi.org/10.1034/j.1600-0773.2003.920608.x>
- Ghoneum, M. (1999, Dec 11-13). *Immunostimulation and cancer prevention* [Abstract]. 7th International Congress on Anti-Aging & Biomedical Technologies, Las Vegas, NV, USA.
- Ghoneum, M., Badr El-Din, N. K., Abdel Fattah, S. M., & Tolentino, L. (2013). Arabinoxylan rice bran (MGN-3/Biobran) provides protection against whole-body gamma -irradiation in mice via restoration of hematopoietic tissues. *Journal of Radiation Research*, 54(3), 419-429.  
<https://doi.org/10.1093/jrr/rrs119>
- Ghoneum, M., Badr El-Din, N. K., Ali, D. A., & Alaa El-Dein, M. (2014). Modified arabinoxylan from rice bran, MGN-3/Biobran, sensitizes metastatic breast cancer cells to paclitaxel in vitro. *Anticancer Research*, 34(1A), 81-87.
- Ghoneum, M., & Brown, J. (1999). NK Immunorestitution and cancer patients by MGN-3, a modified arabinoxylan rice bran (Study of 32 patients followed for up to 4 years). In R. M. Klatz & R. Goldman (Eds.), *Anti-aging Medical Therapeutics* (Vol. III, pp. 217-226). Health Quest Publications.
- Ghoneum, M., & Gollapudi, S. (2003). Modified arabinoxylan rice bran (MGN-3/Biobran) sensitizes human T cell leukemia cells to death receptor (CD95)-induced apoptosis. *Cancer Letters*, 201(1), 41-49. [https://doi.org/10.1016/s0304-3835\(03\)00458-0](https://doi.org/10.1016/s0304-3835(03)00458-0)
- Ghoneum, M., & Gollapudi, S. (2005a). Modified arabinoxylan rice bran (MGN-3/Biobran) enhances yeast-induced apoptosis in human breast cancer cells in vitro. *Anticancer Research*, 25(2a), 859-870.
- Ghoneum, M., & Gollapudi, S. (2005b). Synergistic role of arabinoxylan rice bran (MGN-3/Biobran) in *S. cerevisiae*-induced apoptosis of monolayer breast cancer MCF-7 cells. *Anticancer Research: International Journal of Cancer Research and Treatment*, 25(6b), 4187-4196.
- Ghoneum, M., & Gollapudi, S. (2011). Synergistic apoptotic effect of arabinoxylan rice bran (MGN-3/Biobran) and curcumin (turmeric) on human multiple myeloma cell line U266 in vitro. *Neoplasma*, 58(2), 118-123. [https://doi.org/10.4149/neo\\_2011\\_02\\_118](https://doi.org/10.4149/neo_2011_02_118)
- Ghoneum, M., Tachiki, K. H., Ueyama, K., Makinodan, T., Makhijani, N., & Yamaguchi, D. (2000, Dec 14-17). *Natural biological response modifier (MGN-3) shown to be effective against tumor*

*cell growth* [Abstract]. 8th International Congress on Anti-Aging & Biomedical Technologies, Las Vegas, NV, USA.

Gollapudi, S., & Ghoneum, M. (2008). MGN-3/Biobran, modified arabinoxylan from rice bran, sensitizes human breast cancer cells to chemotherapeutic agent, daunorubicin. *Cancer Detection and Prevention*, 32(1), 1-6. <https://doi.org/10.1016/j.cdp.2008.02.006>

Golombick, T., Diamond, T. H., Manoharan, A., & Ramakrishna, R. (2016). Addition of rice bran arabinoxylan to curcumin therapy may be of benefit to patients with early-stage B-cell lymphoid malignancies (monoclonal gammopathy of undetermined significance, smoldering multiple myeloma, or stage 0/1 chronic lymphocytic leukemia). *Integrative Cancer Therapies*, 15(2), 183-189. <https://doi.org/10.1177/1534735416635742>

Hajt6, T., Horv6th, A., & Papp, S. (2016). Improvement of quality of life in tumor patients after an immunomodulatory treatment with standardized mistletoe lectin and arabinoxylan plant extracts. *International Journal of Neurorehabilitation*, 3(2), 2-4. <https://doi.org/10.4172/2376-0281.1000205>

Itoh, Y., Mizuno, M., Ikeda, M., Nakahara, R., Kubota, S., Ito, J., Okada, T., Kawamura, M., Kikkawa, F., & Naganawa, S. (2015). A randomized, double-blind pilot trial of hydrolyzed rice bran versus placebo for radioprotective effect on acute gastroenteritis secondary to chemoradiotherapy in patients with cervical cancer. *Evidence-based Complementary and Alternative Medicine*, 974390-974390. <https://doi.org/10.1155/2015/974390>

Jacoby, H. I., Wnorowski, G., Sakata, K., & Maeda, H. (2001). The effect of MGN-3 on cisplatin and doxorubicin induced toxicity in the rat. *Journal of Nutraceuticals, Functional & Medical Foods*, 3(4), 3-11. [https://doi.org/10.1300/J133v03n04\\_02](https://doi.org/10.1300/J133v03n04_02)

Kim, D. J., Choi, S. M., Kim, H. Y., Kim, J. H., Ryu, S. N., Han, S. J., & Hong, S. G. (2011). Evaluation of biological activities of fermented rice bran from novel black colored rice cultivar SuperC3GHi. *Korean Journal of Crop Science*, 56(4), 420-426.

Kim, H. Y., Kim, J. H., Yang, S. B., Hong, S. G., Lee, S. A., Hwang, S. J., Shin, K. S., Suh, H. J., & Park, M. H. (2007). A polysaccharide extracted from rice bran fermented with *Lentinus edodes* enhances natural killer cell activity and exhibits anticancer effects. *Journal of Medicinal Food*, 10(1), 25-31. <https://doi.org/10.1089/jmf.2006.116>

Kim, J. M., Hong, S. G., Song, B. S., Sohn, H. J., Baik, H., & Sung, M. K. (2020). Efficacy of cereal-based oral nutrition supplement on nutritional status, inflammatory cytokine secretion and quality of life in cancer patients under cancer therapy. *Journal of Cancer Prevention*, 25(1), 55-63. <https://doi.org/10.15430/JCP.2020.25.1.55>

Lissoni, P., Messina, G., Brivio, F., Fumagalli, L., Rovelli, F., Maruelli, L., Miceli, M., Marchiori, P., Porro, G., Held, M., Fede, G., & Uchiyamada, T. (2008). Modulation of the anticancer

- immunity by natural agents: inhibition of T regulatory lymphocyte generation by arabinoxylan in patients with locally limited or metastatic solid tumors. *Cancer Therapy*, 6(2), 1011-1016.
- Masood, A. I., Sheikh, R., & Anwer, R. A. (2013). "BIOBRAN MGN-3"; Effect of reducing side effects of chemotherapy in breast cancer patients. *The Professional Medical Journal*, 20(1), 13-16.
- Noaman, E., Badr El-Din, N. K., Bibars, M. A., Abou Mossallam, A. A., & Ghoneum, M. (2008). Antioxidant potential by arabinoxylan rice bran, MGN-3/biobran, represents a mechanism for its oncostatic effect against murine solid Ehrlich carcinoma. *Cancer Letters*, 268(2), 348-359. <https://doi.org/10.1016/j.canlet.2008.04.012>
- Pérez-Martínez, A., Valentín, J., Fernández, L., Hernández-Jiménez, E., López-Collazo, E., Zerbés, P., Schwörer, E., Nuñez, F., Martín, I. G., Sallis, H., Díaz, M. Á., Handgretinger, R., & Pfeiffer, M. M. (2015). Arabinoxylan rice bran (MGN-3/Biobran) enhances natural killer cell-mediated cytotoxicity against neuroblastoma in vitro and in vivo. *Cytotherapy*, 17(5), 601-612. <https://doi.org/10.1016/j.jcyt.2014.11.001>
- Pescatore, F. M., Přestáno, C., & Kichikova, M. (2022). RBAC and its role with the immune system. *Alternative Therapies in Health and Medicine*, 28(1), 8-10.
- Petrovics, G., Szigeti, G., Hamvas, S., Mate, A., Betlehem, J., & Hegyi, G. (2016). Controlled pilot study for cancer patients suffering from chronic fatigue syndrome due to chemotherapy treated with BioBran (MGN-3Arabinoxylane) and targeted radiofrequency heat therapy. *European Journal of Integrative Medicine*, 8, 29-35. <https://doi.org/10.1016/j.eujim.2016.10.004>
- Takahara, K., & Sano, K. (2004). The life prolongation and QOL improvement effect of rice bran arabinoxylan derivative (MGN-3, Biobran) for progressive cancer. *Clinical Pharmacology and Therapy*, 14(3), 267-271.
- Tan, D. F. S., & Flores, J. A. S. (2020). The immunomodulating effects of arabinoxylan rice bran ( Lentin ) on hematologic profile, nutritional status and quality of life among head and neck carcinoma patients undergoing radiation therapy: A double blind randomized control trial. *Radiology Journal, The Official Publication of the Philippine College of Radiology*, 12(February), 11-16.
- Zhao, Z., Cheng, W., Qu, W., & Wang, K. (2020). Arabinoxylan rice bran (MGN-3/Biobran) alleviates radiation-induced intestinal barrier dysfunction of mice in a mitochondrion-dependent manner. *Biomedicine & Pharmacotherapy*, 124, 109855. <https://doi.org/10.1016/j.biopha.2020.109855>
- Zheng, S., Sanada, H., Dohi, H., Hirai, S., & Egashira, Y. (2012a). Suppressive effect of modified arabinoxylan from rice bran (MGN-3) on D-galactosamine-induced IL-18 expression and hepatitis in rats. *Bioscience, Biotechnology, and Biochemistry*, 76(5), 942-946. <https://doi.org/10.1271/bbb.110968>
