# Supplementary material for: Rice Bran Arabinoxylan Compound as a Natural Product for Cancer Treatment – An Evidence-based Assessment of the Effects and Mechanisms
Source: Preprints.org preprint supplement (doi:10.20944/preprints202310.1057.v1), 2023-10-17
Supplement: Supplementary file 3 [file supplementary]

Archive with 2 entries (2 files):
- Supplementary S1.pdf
- Supplementary S2.pdf
